# Supplementary material for: Comparison of different normalization strategies for the analysis of glomerular microRNAs in IgA nephropathy
Source: PubMed Central journal article supplement (PMC4995590; doi:10.1038/srep31992), 2016-08-24
Supplement: srep31992-s1.pdf [file srep31992-s1.pdf]

## Supplementary information

### Comparison of different normalization strategies for the analysis of glomerular microRNAs in IgA nephropathy

Clemens L. Bockmeyer<sup>1,2</sup>, Karen Säuberlich<sup>3</sup>, Juliane Witting<sup>3</sup>, Marc Eßer<sup>3</sup>, Sebastian S. Roeder<sup>1</sup>, Udo Vester<sup>4</sup>, Peter F. Hoyer<sup>4</sup>, Putri A. Agustian<sup>5</sup>, Philip Zeuschner<sup>3</sup>, Kerstin Amann<sup>1</sup>, Christoph Daniel<sup>1</sup>, Jan U. Becker<sup>3</sup>

<sup>1</sup> Department of Nephropathology, Friedrich Alexander University (FAU) Erlangen-Nuremberg, Germany.

<sup>2</sup> Institute of Pathology, Hannover Medical School, Hannover, Germany.

<sup>3</sup> Institute of Pathology, University Hospital of Cologne, Cologne, Germany.

<sup>4</sup> Children's Hospital, Pediatrics II, University of Duisburg-Essen, Essen, Germany.

<sup>5</sup> Department of Nephrology, Hannover Medical School, Hannover, Germany.

Corresponding author:

Clemens L. Bockmeyer, MD

Department of Nephropathology

Institute of Pathology

FAU Erlangen-Nuremberg

Krankenhausstraße 8-10

91054 Erlangen

Germany

[clemens.bockmeyer@uk-erlangen.de](mailto:clemens.bockmeyer@uk-erlangen.de) or

[bockmeyer@gmail.com](mailto:bockmeyer@gmail.com)

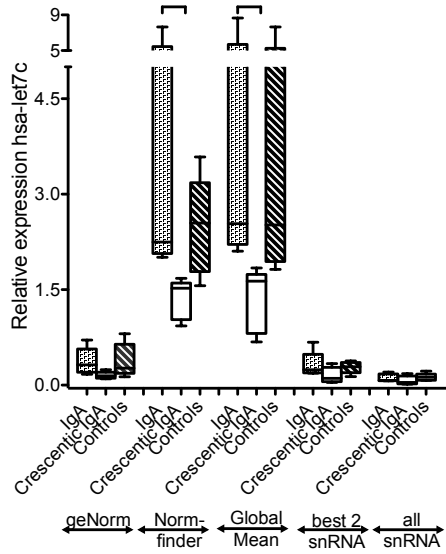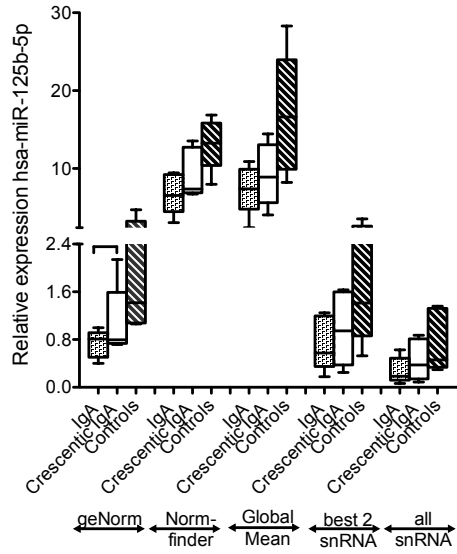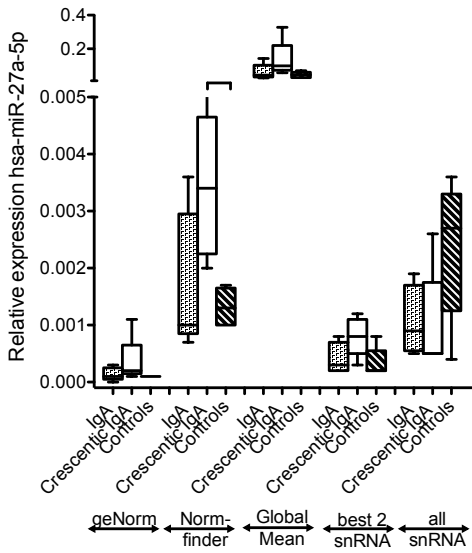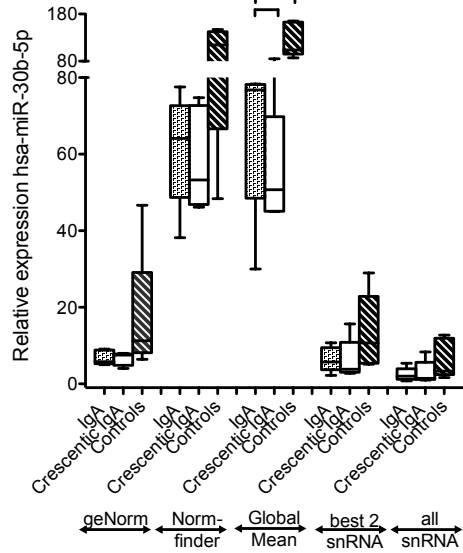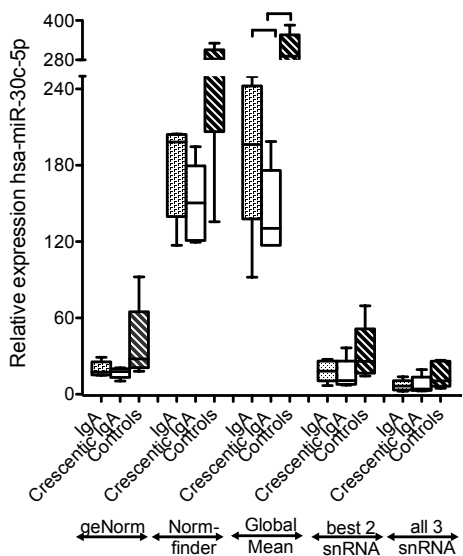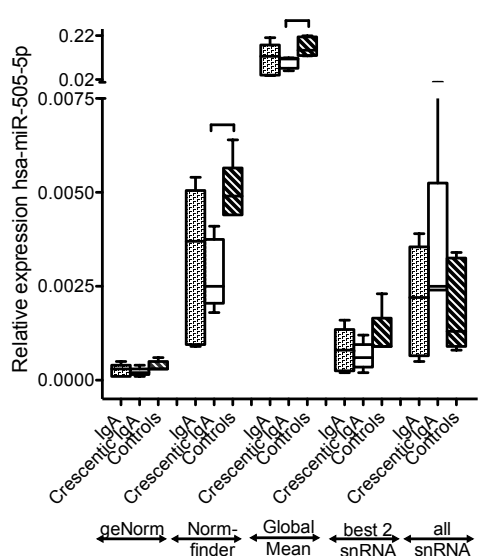

### **Supplementary Figure**

**Another six miRNAs are shown in dependence of different normalization approaches in analogy to Fig. 6..** Most miRNAs demonstrated less consistency throughout different normalization methods. The best two snRNAs for normalization of miRNAs from Card A (let-7c, miR-125b-5p, miR-30b-5p, miR-30c-5p) were RNU44 and RNU48 in to contrast to Card B (miR-27a-5p, miR-505-5p) when RNU48 and snRNU6 was used.

## Supplementary Table 1

Sequences and accession numbers of endogenous reference miRNAs suggested by geNormPlus and NormFinder. Furthermore, miRNAs with significantly different expression in IgA nephropathy are shown according to consistency throughout different normalization methods. All described miRNAs are human species.

| Gene symbol                                                                                              | Previous gene symbol | Target sequence          | Assay ID |
|----------------------------------------------------------------------------------------------------------|----------------------|--------------------------|----------|
| <b>Intersection of the best 15 reference genes from geNormPlus and NormFinder</b>                        |                      |                          |          |
| miR-10b-3p                                                                                               | miR-10b#             | ACAGAUUCGAUUCUAGGGAAU    | 002315   |
| miR-1260a                                                                                                | miR-1260             | AUCCCACCUCUGCCACCA       | 002896   |
| miR-127-3p                                                                                               | miR-127              | UCGGAUCCGUCUGAGCUUGGCU   | 000452   |
| tRNA(thr) derived fragment                                                                               | miR-1274A            | GUCCUGUUCAGGCGCCA        | 002883   |
| miR-181a-5p                                                                                              | miR-181a             | AACAUUCAACGCUGUCGGUGAGU  | 000480   |
| miR-181a-2-3p                                                                                            | miR-181a-2#          | ACCACUGACCGUUGACUGUACC   | 002317   |
| miR-195-5p                                                                                               | miR-195              | UAGCAGCACAGAAUAUUGGC     | 000494   |
| miR-26b-5p                                                                                               | miR-26b              | UUCAAGUAAUUCAGGAUAGGU    | 000407   |
| miR-28-5p                                                                                                | miR-28               | AAGGAGCUCACAGUCUAUUGAG   | 000411   |
| miR-30a-3p                                                                                               | miR-30a-3p           | CUUUCAGUCGGAUGUUUGCAGC   | 000416   |
| miR-30a-5p                                                                                               | miR-30a-5p           | UGUAAACAUCCUCGACUGGAAG   | 000417   |
| miR-30d-5p                                                                                               | miR-30d              | UGUAAACAUCCCGACUGGAAG    | 000420   |
| miR-361-5p                                                                                               | miR-361              | UUAUCAGAAUCUCCAGGGGUAC   | 000554   |
| tRNA(thr) derived fragment                                                                               | miR-720              | UCUCGCUGGGGCCUCCA        | 002895   |
| miR-92a-3p                                                                                               | miR-92a              | UAUUGCACUUGUCCCGGCCUGU   | 000431   |
| <b>Significantly different with high consistency throughout different normalization methods</b>          |                      |                          |          |
| miR-132-3p                                                                                               | miR-132              | UAACAGUCUACAGCCAUGGUCG   | 000457   |
| miR-146b-5p                                                                                              | miR-146b             | UGAGAACUGAAUCCAUAGGCU    | 001097   |
| miR-184                                                                                                  | miR-184              | UGGACGGAGAACUGAUAGGGU    | 000485   |
| miR-708-5p                                                                                               | miR-708              | AAGGAGCUUACAAUCUAGCUGGG  | 002341   |
| <b>Significantly different miRNAs with medium consistency throughout different normalization methods</b> |                      |                          |          |
| miR-155-5p                                                                                               | miR-155              | UUA AUGCUAAUCGUGAUAGGGGU | 002623   |
| miR-21-5p                                                                                                | miR-21               | UAGCUUAUCAGACUGAUGUUGA   | 000397   |
| let7c                                                                                                    | let7c                | UGAGGUAGUAGGUUGUAUGGUU   | 000379   |
| <b>Significantly different miRNAs with less consistency throughout different normalization methods</b>   |                      |                          |          |
| miR-125b-5p                                                                                              | miR-125b             | UCCUGAGACCCUAAUUGUGA     | 000449   |
| miR-27a-5p                                                                                               | miR-27a#             | AGGGCUUAGCUGCUUGUGAGCA   | 002445   |
| miR-30b-5p                                                                                               | miR-30b              | UGUAAACAUCCUACACUCAGCU   | 000602   |
| miR-30c-5p                                                                                               | miR-30c              | UGUAAACAUCCUACACUCAGC    | 000419   |
| miR-505-5p                                                                                               | miR-505#             | GGGAGCCAGGAAGUAUUGAUGU   | 002087   |

## Supplementary Table 2

Overview of applied reference genes in publications between January 2008 and December 2014 about miRNAs related to non-neoplastic renal diseases.

Studies on IgA-GN are highlighted bold printed.

| <b>Autor / Seniorautor</b> | <b>Topic</b>              | <b>Titel</b>                                                                                                                                                   | <b>Journal</b>         | <b>Year</b> | <b>Reference microRNA</b> | <b>Renal Tissue (species)</b>         |
|----------------------------|---------------------------|----------------------------------------------------------------------------------------------------------------------------------------------------------------|------------------------|-------------|---------------------------|---------------------------------------|
| Kato/ Natarajan            | Diabetic Nephropathy      | Post-transcriptional Up-regulation of Tsc-22 by Ybx1, a Target of miR-216a, Mediates TGF- $\beta$ -induced Collagen Expression in Kidney Cells                 | J. Biol. Chem          | 2010        | 18s rRNA                  | mouse                                 |
| Putta/ Natarajan           | Renal Fibrosis            | Inhibiting microRNA-192 ameliorates renal fibrosis in diabetic nephropathy                                                                                     | J. Am. Soc. Nephrol    | 2012        | 18s rRNA                  | mouse                                 |
| Patel/ Igarashi            | Polycystic Kidney Disease | miR-17-92 miRNA cluster promotes kidney cyst growth in polycystic kidney disease.                                                                              | PNAS                   | 2013        | 18s rRNA and 5s rRNA      | mouse                                 |
| Kato/ Natarajan            | Diabetic Nephropathy      | TGF-beta activates Akt kinase through a microRNA-dependent amplifying circuit targeting PTEN                                                                   | Nat Cell Biol.         | 2009        | 18s rRNA or 5s rRNA       | mouse                                 |
| Kato/ Natarajan            | Diabetic Nephropathy      | MicroRNA-192 in diabetic kidney glomeruli and its function in TGF-beta-induced collagen expression via inhibition of E-box repressors                          | PNAS USA               | 2007        | 5s rRNA                   | mouse                                 |
| Kato/ Natarajan            | Glomerular Fibrosis       | A microRNA circuit mediates transforming growth factor- $\beta$ 1 autoregulation in renal glomerular mesangial cells                                           | Kidney Int             | 2011        | 5s rRNA                   | mouse                                 |
| Fu/Yi                      | Diabetic Nephropathy      | Regulation of NADPH oxidase activity is associated with miRNA-25-mediated NOX4 expression in experimental diabetic nephropathy.                                | Am. J. Nephrol         | 2010        | 5s rRNA                   | rat                                   |
| Liu/Liang                  | Hypertension              | Renal medullary microRNAs in Dahl salt-sensitive rats: miR-29b regulates several collagens and related genes                                                   | Hypertension           | 2010        | 5s rRNA                   | rat                                   |
| Bai/Chen                   | Aging /Development        | miR-335 and miR-34a promote renal senescence by suppressing mitochondrial antioxidative enzymes.                                                               | J Am Soc Nephrol       | 2011        | 5s rRNA                   | rat                                   |
| Lin/Wang                   | Physiology/ Anatomy       | MicroRNA 802 stimulates ROMK channels by suppressing caveolin-1                                                                                                | J. Am. Soc. Nephrol    | 2011        | GAPDH                     | mouse                                 |
| Krupa/Fraser               | Diabetic Nephropathy      | Loss of MicroRNA-192 promotes fibrogenesis in diabetic nephropathy                                                                                             | J. Am. Soc. Nephrol    | 2010        | miR-16 (TLDA)             | human                                 |
| Pandey/Gretz               | Polycystic Kidney Disease | Microarray-based approach identifies microRNAs and their target functional patterns in polycystic kidney disease                                               | BMC Genomics           | 2008        | miR-193a                  | rat                                   |
| Dweep/ Gretz               | Polycystic Kidney Disease | Parallel analysis of mRNA and microRNA microarray profiles to explore functional regulatory patterns in polycystic kidney disease: using PKD/Mhm rat model     | PLoS One               | 2013        | miR-193a                  | rat                                   |
| Mladinov/ Laing            | Physiology/ Anatomy       | MicroRNAs contribute to the maintenance of cell-type-specific physiological characteristics: miR-192 targets Na <sup>+</sup> /K <sup>+</sup> -ATPase $\beta$ 1 | Nucleic Acids Res      | 2013        | nicht angegeben           | rat                                   |
| Chau/Duffield              | Renal Fibrosis            | MicroRNA-21 promotes fibrosis of the kidney by silencing metabolic pathways.                                                                                   | Sci. Transl. Med.      | 2012        | RNU19                     | human                                 |
| Anglicheau/ Suthanthiran   | Renal Allograft Rejection | MicroRNA expression profiles predictive of human renal allograft status                                                                                        | PNAS USA               | 2009        | RNU44                     | human                                 |
| Wang/Szeto                 | Hypertension              | Intrarenal expression of miRNAs in patients with hypertensive nephrosclerosis.                                                                                 | Am J Hypertens         | 2010        | RNU48                     | human                                 |
| <b>Wang/Szeto</b>          | <b>IgA nephropathy</b>    | <b>Intrarenal expression of microRNAs in patients with IgA nephropathy.</b>                                                                                    | <b>Lab. Invest</b>     | <b>2010</b> | <b>RNU48</b>              | <b>human</b>                          |
| <b>Wang/Szeto</b>          | <b>IgA nephropathy</b>    | <b>Elevated levels of miR-146a and miR-155 in kidney biopsy and urine from patients with IgA nephropathy</b>                                                   | <b>Dis. Markers</b>    | <b>2011</b> | <b>RNU48</b>              | <b>human</b>                          |
| Zhou/Illei                 | Lupus nephritis           | miR-150 promotes renal fibrosis in lupus nephritis by downregulating SOCS1                                                                                     | J. Am. Soc. Nephrol    | 2013        | RNU48                     | human                                 |
| Brennan/ Godson            | Renal Fibrosis            | Lipoxins attenuate renal fibrosis by inducing let-7c and suppressing TGF $\beta$ R1                                                                            | JASN                   | 2013        | RNU48                     | human                                 |
| Lu/Szeto                   | Lupus nephritis           | Glomerular and tubulointerstitial miR-638, miR-198 and miR-146a expression in lupus nephritis                                                                  | Nephrology (Carlton)   | 2012        | RNU48                     | human (frozen, laser-microdissection) |
| Denby/ Baker               | Renal Fibrosis            | miR-21 and miR-214 are consistently modulated during renal injury in rodent models.                                                                            | Am. J. Pathol          | 2011        | RNU87                     | rat                                   |
| Li/ Lin                    | Diabetic Nephropathy      | MiR-124 is related to podocytic adhesive capacity damage in STZ-induced uninephrectomized diabetic rats                                                        | Kidney Blood Press Res | 2013        | RNU87                     | rat                                   |
| Ramdas/ Baker              | Renal Fibrosis            | Canonical transforming growth factor- $\beta$ signaling regulates disintegrin metalloprotease expression in experimental renal fibrosis via miR-29.            | Am. J. Pathol.         | 2013        | RNU87 / snRNU6            | mouse/rat                             |

| Autor / Seniorautor | Topic                 | Titel                                                                                                                                                                                             | Journal                             | Year        | Reference microRNA | Renal Tissue (species)         |
|---------------------|-----------------------|---------------------------------------------------------------------------------------------------------------------------------------------------------------------------------------------------|-------------------------------------|-------------|--------------------|--------------------------------|
| Wang/ Kantharidis   | Diabetic Nephropathy  | miR-200a Prevents renal fibrogenesis through repression of TGF-beta2 expression.                                                                                                                  | Diabetes                            | 2011        | RNU87 or snoRNA135 | mouse/rat                      |
| Wang/ Kantharidis   | Renal Fibrosis        | Transforming growth factor- $\beta$ 1-mediated renal fibrosis is dependent on the regulation of transforming growth factor receptor 1 expression by let-7b.                                       | Kidney Int                          | 2014        | RNU87 or snoRNA135 | mouse/rat                      |
| Wang/Quigg          | Diabetic Nephropathy  | MicroRNA-377 is up-regulated and can lead to increased fibronectin production in diabetic nephropathy                                                                                             | FASEB J                             | 2008        | snoRNA 234/ U18    | human/mouse                    |
| Ichii/Kon           | Chronic inflammation  | Altered expression of microRNA miR-146a correlates with the development of chronic renal inflammation.                                                                                            | Kidney Int                          | 2012        | snoRNA202          | mouse                          |
| Bhatt/Dong          | Acute Kidney Injury   | MicroRNA-34a is induced via p53 during cisplatin nephrotoxicity and contributes to cell survival                                                                                                  | Mol Med                             | 2010        | snoRNA202          | mouse                          |
| Godwin/ Iacomini    | Acute Kidney Injury   | Identification of a microRNA signature of renal ischemia reperfusion injury                                                                                                                       | PNAS USA                            | 2010        | snoRNA202          | mouse                          |
| Shapiro/ Iacomini   | Acute Kidney Injury   | MicroRNA Expression Data Reveals a Signature of Kidney Damage following Ischemia Reperfusion Injury                                                                                               | PLoS one                            | 2011        | snoRNA202          | mouse                          |
| Wie/Dong            | Acute Kidney Injury   | Targeted Deletion of Dicer from Proximal Tubules Protects against Renal Ischemia-Reperfusion Injury                                                                                               | J. Am. Soc. Nephrol                 | 2010        | snoRNA202          | mouse                          |
| Marrone/Ho          | Genetic renal disease | MicroRNA-17~92 is required for nephrogenesis and renal function                                                                                                                                   | J. Am. Soc. Nephrol                 | 2014        | snoRNA234/ Rps17   | mouse                          |
| Dai/Huang           | Lupus nephritis       | Comprehensive analysis of microRNA expression patterns in renal biopsies of lupus nephritis patients                                                                                              | Rheumatol. Int                      | 2009        | snRNU6             | human                          |
| Te/Ojwang           | Lupus nephritis       | Identification of unique microRNA signature associated with lupus nephritis                                                                                                                       | PLoS ONE                            | 2010        | snRNU6             | human                          |
| Bao/Liu             | IgA-Nephropathy       | <b>miR-223 downregulation promotes glomerular endothelial cell activation by upregulating importin <math>\alpha</math>4 and <math>\alpha</math>5 in IgA nephropathy</b>                           | <b>Kidney Int.</b>                  | <b>2013</b> | <b>snRNU6</b>      | <b>human (Microdissection)</b> |
| Bao/Liu             | IgA-Nephropathy       | <b>Inhibition of miRNA-21 prevents fibrogenic activation in podocytes and tubular cells in IgA nephropathy</b>                                                                                    | <b>Biochem Biophys Research Com</b> | <b>2014</b> | <b>snRNU6</b>      | <b>human (Microdissection)</b> |
| Cheng/ Singhal      | HIVAN                 | MicroRNAs in HIV-associated nephropathy (HIVAN)                                                                                                                                                   | Exp Mol Pathol                      | 2013        | snRNU6             | human/mouse                    |
| Long/Danesh         | Diabetic Nephropathy  | Identification of MicroRNA-93 as a Novel Regulator of Vascular Endothelial Growth Factor in Hyperglycemic Conditions                                                                              | J. Biol. Chem                       | 2010        | snRNU6             | mouse                          |
| Oba/Fujita          | Renal Fibrosis        | miR-200b precursor can ameliorate renal tubulointerstitial fibrosis.                                                                                                                              | PLoS One                            | 2010        | snRNU6             | mouse                          |
| Zhong/ Lan          | Renal Fibrosis        | Smad3-Mediated Upregulation of miR-21 Promotes                                                                                                                                                    | J. Am. Soc. Nephrol                 | 2011        | snRNU6             | mouse                          |
| Qin/Lan             | Renal Fibrosis        | TGF- $\beta$ /Smad3 signaling promotes renal fibrosis by inhibiting miR-29                                                                                                                        | J. Am. Soc. Nephrol                 | 2011        | snRNU6             | mouse                          |
| Park/ Natarajan     | Diabetic Nephropathy  | FOG2 protein down-regulation by transforming growth factor- $\beta$ 1-induced microRNA-200b/c leads to Akt kinase activation and glomerular mesangial hypertrophy related to diabetic nephropathy | J. Biol. Chem                       | 2013        | snRNU6             | mouse                          |
| Mu/ Feng            | Diabetic Nephropathy  | Functional Implications of MicroRNA-215 in TGF- $\beta$ 1-Induced Phenotypic Transition of Mesangial Cells by Targeting CTNBP1                                                                    | PLoS One                            | 2013        | snRNU6             | mouse                          |
| Li/Lan              | Renal Fibrosis        | The microRNA miR-433 promotes renal fibrosis by amplifying the TGF- $\beta$ /Smad3-Azin1 pathway                                                                                                  | Kidney Int                          | 2013        | snRNU6             | mouse                          |
| Jiang/Yang          | Renal Fibrosis        | A microRNA-30e/mitochondrial uncoupling protein 2 axis mediates TGF- $\beta$ 1-induced tubular epithelial cell extracellular matrix production and kidney fibrosis                                | Kidney Int.                         | 2013        | snRNU6             | mouse                          |
| Wang/Yang           | Diabetic Nephropathy  | Tongxinluo ameliorates renal structure and function by regulating miR-21-induced epithelial-mesenchymal transition in diabetic nephropathy.                                                       | Am. J. Physiol. Renal Physiol       | 2014        | snRNU6             | mouse                          |
| Lin/Wang            | Diabetic Nephropathy  | MicroRNA-29a promotion of nephrin acetylation ameliorates hyperglycemia-induced podocyte dysfunction                                                                                              | J. Am. Soc. Nephrol.                | 2014        | snRNU6             | mouse                          |
| Chen/Lan            | Diabetic Nephropathy  | MicroRNA-29b inhibits diabetic nephropathy in db/db mice                                                                                                                                          | Mol. Ther                           | 2014        | snRNU6             | mouse                          |
| Denby/ Baker        | Renal Fibrosis        | MicroRNA-214 antagonism protects against renal fibrosis                                                                                                                                           | J. Am. Soc. Nephrol                 | 2014        | snRNU6             | mouse                          |
| Zhong/ Lan          | Diabetic Nephropathy  | miR-21 is a key therapeutic target for renal injury in a mouse model of type 2 diabetes                                                                                                           | Diabetologia                        | 2013        | snRNU6             | mouse/rat                      |
| Chung/ Lan          | Renal Fibrosis        | Smad7 suppresses renal fibrosis via altering expression of TGF- $\beta$ /Smad3-regulated microRNAs                                                                                                | Mol Ther                            | 2013        | snRNU6             | mouse/rat                      |
| Xiong/Yang          | Renal Fibrosis        | The miR-200 family regulates TGF- $\beta$ 1-induced renal tubular epithelial to mesenchymal transition through Smad pathway by targeting ZEB1 and ZEB2 expression                                 | Am. J. Physiol. Renal Physiol       | 2012        | snRNU6             | rat                            |
| Li/ Lin             | Diabetic Nephropathy  | Curcumin ameliorates Podocytic adhesive capacity damage under mechanical stress by inhibiting miR-124 expression                                                                                  | Kidney Blood Press Res              | 2013        | snRNU6             | rat                            |

| <b>Autor / Seniorautor</b> | <b>Topic</b>              | <b>Titel</b>                                                                                                                                                                     | <b>Journal</b>       | <b>Year</b> | <b>Reference microRNA</b>       | <b>Renal Tissue (species)</b>  |
|----------------------------|---------------------------|----------------------------------------------------------------------------------------------------------------------------------------------------------------------------------|----------------------|-------------|---------------------------------|--------------------------------|
| Sui/Huang                  | Renal Allograft Rejection | Microarray analysis of MicroRNA expression in acute rejection after renal transplantation                                                                                        | Transpl Immunol      | 2008        | snRNU6                          | human                          |
| Long/Danesh                | Diabetic Nephropathy      | MicroRNA-29c is a signature microRNA under high glucose conditions that targets Sprouty homolog 1, and its in vivo knockdown prevents progression of diabetic nephropathy        | J Biol Chem          | 2011        | snRNU6                          | mouse                          |
| Serino/ Schena             | Diabetic Nephropathy      | Abnormal miR-148b expression promotes aberrant glycosylation of IgA1 in IgA nephropathy                                                                                          | J. Am. Soc. Nephrol  | 2012        | snRNU6                          | mouse                          |
| Macconi/ Benigni           | Renal Fibrosis            | MicroRNA-324-3p promotes renal fibrosis and is a target of ACE inhibition.                                                                                                       | J. Am. Soc. Nephrol  | 2012        | snRNU6 (also TLDA)              | mouse (Micro-dissection)       |
| Chung/ Lan                 | Renal Fibrosis            | miR-192 mediates TGF- $\beta$ /Smad3-driven renal fibrosis.                                                                                                                      | J. Am. Soc. Nephrol  | 2010        | snRNU6 (snRNU6, RNU48 for TLDA) | rat                            |
| Liu/ Lan                   | Renal Fibrosis            | Disruption of Smad7 promotes ANG II-mediated renal inflammation and fibrosis via Sp1-TGF- $\beta$ /Smad3-NF. $\kappa$ B-dependent mechanisms in mice                             | PLoS One             | 2013        | snRNU6 / GAPDH                  | mouse                          |
| Shi/ Bottinger             | Glomerular Kidney Disease | Smad2-dependent downregulation of miR-30 is required for TGF- $\beta$ -induced apoptosis in podocytes                                                                            | PLoS One             | 2013        | snRNU6, 5s RNA                  | mouse                          |
| Patel/ Igarashi            | Polycystic Kidney Disease | MicroRNAs regulate renal tubule maturation through modulation of Pkd1.                                                                                                           | J. Am. Soc. Nephrol  | 2012        | snRNU6, 5s RNA, 18s RNA         | mouse                          |
| Deshpande/Natarajan        | Diabetic Nephropathy      | Transforming growth factor- $\beta$ -induced cross talk between p53 and a microRNA in the pathogenesis of diabetic nephropathy                                                   | Diabetes             | 2013        | snRNU6, RNU44, RNU48            | human/mouse (Micro-dissection) |
| Sene/ Boer                 | Renal Fibrosis            | Involvement of renal corpuscle microRNA expression on epithelial-to-mesenchymal transition in maternal low protein diet in adult programmed rats                                 | PLoS One             | 2013        | snRNU6, RNU87                   | rat                            |
| Zhdanova/ Skolnik          | Podocytopathia            | The inducible deletion of Drosha and microRNAs in mature podocytes results in a collapsing glomerulopathy                                                                        | Kidney Int           | 2011        | snRNU6, RNU87 (TLDA)            | mouse                          |
| Wang/ Kantharidis          | Renal Fibrosis            | Suppression of microRNA-29 expression by TGF- $\beta$ 1 promotes collagen expression and renal fibrosis                                                                          | J. Am. Soc. Nephrol. | 2012        | snRNU6B                         | mouse/rat                      |
| Alvarez/ Kiefer            | Diabetic Nephropathy      | Role of microRNA 1207-5P and its host gene, the long non-coding RNA Pvt1, as mediators of extracellular matrix accumulation in the kidney: implications for diabetic nephropathy | PLoS One             | 2013        | snRNU6B, RNU44                  | human                          |
| Wang/ Kantharidis          | Diabetic Nephropathy      | E-cadherin expression is regulated by miR-192/215 by a mechanism that is independent of the profibrotic effects of transforming growth factor-beta.                              | Diabetes             | 2010        | snRNU6B, Sno135, or RNU87       | mouse                          |
| Lee/LaRusso                | Polycystic Kidney Disease | MicroRNA15a modulates expression of the cell-cycle regulator Cdc25A and affects hepatic cystogenesis in a rat model of polycystic kidney disease                                 | J Clin Invest        | 2008        | tRNA met                        | rat                            |

**Supplementary Table 3 (see excel file)**

All 762  $C_q$  values are provided for further individual analysis. 240 analyzed (32%; 180 from Pool A and 60 from Pool B) and the 522 discarded miRNAs are shown in separate sheets.  $C_q$  values  $>32$  are highlighted in orange and  $C_q$  values = 45 in purple.
